# Supplementary material for: Head-to-Head Accuracy Comparison of Three Commercial COVID-19 IgM/IgG Serology Rapid Tests
Source: PubMed Central journal article supplement (PMC7463984; doi:10.3390/jcm9082369), 2020-07-24
Supplement: jcm-09-02369-s001.pdf [file jcm-09-02369-s001.pdf]

## SUPPLEMENTARY MATERIALS

**Table S1.** Characteristics of SARS-CoV-2 IgG detection by three COVID-19 IgM/IgG Rapid Test, recombinant IFA and Euroimmun IgG ELISA immunoassays in 41 hospitalized qRT-PCR confirmed COVID-19 patients.

| Case | Sex | Age | DPD (Days) | IgG RDT-A        |             | IgG RDT-B        |             | IgG RDT-C        |             | rIFA IgG | ELISA IgG |        |
|------|-----|-----|------------|------------------|-------------|------------------|-------------|------------------|-------------|----------|-----------|--------|
|      |     |     |            | Whole blood EDTA | Plasma EDTA | Whole blood EDTA | Plasma EDTA | Whole blood EDTA | Plasma EDTA |          | Ratio     | Result |
| 1    | f   | 74  | 29         | POS              | POS         | POS              | POS         | POS              | POS         | POS      | 15.39     | POS    |
| 2    | m   | 57  | 9          | POS              | POS         | POS              | POS         | POS              | POS         | POS      | 14.59     | POS    |
| 3    | f   | 83  | 19         | NEG              | NEG         | NEG              | NEG         | NEG              | NEG         | NEG      | 0.21      | NEG    |
| 4    | m   | 56  | 23         | POS              | POS         | POS              | POS         | POS              | POS         | POS      | 16.62     | POS    |
| 5    | m   | 53  | 10         | NEG              | NEG         | POS              | POS         | POS              | POS         | NEG      | 2.98      | POS    |
| 6    | f   | 63  | 24         | POS              | POS         | POS              | POS         | POS              | POS         | POS      | 18.21     | POS    |
| 7    | m   | 71  | 31         | POS              | POS         | POS              | POS         | POS              | POS         | POS      | 16.32     | POS    |
| 8    | m   | 76  | 22         | NEG              | POS         | NEG              | POS         | POS              | POS         | POS      | 0.53      | INDET. |
| 9    | m   | 80  | 24         | POS              | POS         | POS              | POS         | POS              | POS         | POS      | 15.77     | POS    |
| 10   | f   | 82  | 9          | NEG              | NEG         | NEG              | POS         | POS              | POS         | POS      | 8.58      | POS    |
| 11   | m   | 50  | 0          | POS              | POS         | POS              | POS         | POS              | POS         | POS      | 18.41     | POS    |
| 12   | m   | 76  | 13         | POS              | POS         | POS              | POS         | POS              | POS         | POS      | 6.95      | POS    |
| 13   | f   | 74  | 9          | NEG              | NEG         | NEG              | NEG         | NEG              | NEG         | NEG      | 0.47      | NEG    |
| 14   | f   | 60  | 26         | POS              | POS         | POS              | POS         | POS              | POS         | POS      | 17.75     | POS    |
| 15   | m   | 75  | 34         | POS              | POS         | POS              | POS         | POS              | POS         | POS      | 18        | POS    |
| 16   | m   | 70  | 9          | POS              | POS         | POS              | POS         | POS              | POS         | POS      | 15.8      | POS    |
| 17   | m   | 66  | 34         | POS              | POS         | POS              | POS         | POS              | POS         | POS      | 17.91     | POS    |
| 18   | m   | 78  | 30         | POS              | POS         | POS              | POS         | POS              | POS         | POS      | 14.53     | POS    |
| 19   | f   | 76  | 31         | POS              | POS         | INVALID          | POS         | POS              | POS         | POS      | 2.04      | POS    |
| 20   | m   | 66  | 36         | POS              | POS         | POS              | POS         | POS              | POS         | POS      | 17.84     | POS    |
| 21   | m   | 74  | 13         | POS              | POS         | POS              | POS         | POS              | POS         | POS      | 16.89     | POS    |
| 22   | f   | 60  | 14         | POS              | POS         | POS              | POS         | POS              | POS         | POS      | 14.83     | POS    |
| 23   | m   | 79  | 9          | POS              | POS         | POS              | POS         | POS              | POS         | POS      | 18        | POS    |
| 24   | m   | 68  | 30         | POS              | POS         | POS              | POS         | POS              | POS         | POS      | 18.92     | POS    |
| 25   | m   | 51  | 13         | POS              | POS         | POS              | POS         | POS              | POS         | POS      | 18.08     | POS    |
| 26   | m   | 66  | 25         | POS              | POS         | POS              | POS         | POS              | POS         | POS      | 18.96     | POS    |
| 27   | m   | 67  | 31         | POS              | NEG         | POS              | POS         | POS              | POS         | POS      | 18.89     | POS    |
| 28   | m   | 78  | 35         | POS              | POS         | NEG              | POS         | POS              | POS         | POS      | 18.65     | POS    |
| 29   | f   | 84  | 19         | POS              | POS         | POS              | POS         | POS              | POS         | POS      | 2.16      | POS    |
| 30   | m   | 64  | 28         | POS              | POS         | POS              | POS         | POS              | POS         | POS      | 17.94     | POS    |
| 31   | m   | 76  | 22         | POS              | POS         | POS              | POS         | POS              | POS         | POS      | 16.91     | POS    |
| 32   | m   | 51  | 28         | POS              | POS         | POS              | POS         | POS              | POS         | POS      | 20.64     | POS    |
| 33   | m   | 83  | 14         | POS              | POS         | POS              | POS         | POS              | POS         | POS      | 17.03     | POS    |
| 34   | m   | 62  | 15         | POS              | POS         | NEG              | NEG         | POS              | POS         | POS      | 0.59      | INDET. |
| 35   | m   | 65  | 41         | POS              | POS         | POS              | POS         | POS              | POS         | POS      | 17.06     | POS    |

|    |   |    |    |     |     |     |     |     |     |     |       |     |
|----|---|----|----|-----|-----|-----|-----|-----|-----|-----|-------|-----|
| 36 | m | 81 | 11 | POS | POS | POS | POS | POS | POS | POS | 19.86 | POS |
| 37 | m | 70 | 38 | POS | POS | POS | POS | POS | POS | POS | 15.61 | POS |
| 38 | m | 71 | 16 | POS | POS | POS | POS | POS | POS | POS | 19.82 | POS |
| 39 | m | 72 | 14 | POS | POS | POS | POS | POS | POS | POS | 16.27 | POS |
| 40 | m | 71 | 16 | NEG | POS | POS | POS | POS | POS | POS | 6.16  | POS |
| 41 | m | 56 | 35 | POS | POS | POS | POS | POS | POS | POS | 18.66 | POS |

**Table S2.** Characteristics of SARS-CoV-2 IgM detection by three COVID-19 IgM/IgG Rapid Test in 41 hospitalized qRT-PCR confirmed COVID-19 patients.

| Case | Sex | Age | DPD (Days) | IgM RDT-A   |             | IgM RDT-B   |             | IgM RDT-C   |             |
|------|-----|-----|------------|-------------|-------------|-------------|-------------|-------------|-------------|
|      |     |     |            | Whole blood | Plasma EDTA | Whole blood | Plasma EDTA | Whole blood | Plasma EDTA |
| 1    | f   | 74  | 29         | NEG         | NEG         | POS         | POS         | POS         | POS         |
| 2    | m   | 57  | 9          | NEG         | NEG         | POS         | POS         | POS         | POS         |
| 3    | f   | 83  | 19         | NEG         | NEG         | NEG         | NEG         | NEG         | NEG         |
| 4    | m   | 56  | 23         | NEG         | NEG         | POS         | POS         | POS         | POS         |
| 5    | m   | 53  | 10         | NEG         | NEG         | POS         | POS         | POS         | POS         |
| 6    | f   | 63  | 24         | NEG         | NEG         | POS         | POS         | POS         | POS         |
| 7    | m   | 71  | 31         | NEG         | NEG         | NEG         | NEG         | POS         | POS         |
| 8    | m   | 76  | 22         | NEG         | NEG         | NEG         | NEG         | POS         | POS         |
| 9    | m   | 80  | 24         | POS         | NEG         | POS         | POS         | POS         | POS         |
| 10   | f   | 82  | 9          | NEG         | NEG         | NEG         | NEG         | POS         | NEG         |
| 11   | m   | 50  | 0          | NEG         | NEG         | POS         | POS         | POS         | POS         |
| 12   | m   | 76  | 13         | NEG         | NEG         | NEG         | POS         | POS         | POS         |
| 13   | f   | 74  | 9          | NEG         | NEG         | NEG         | NEG         | NEG         | NEG         |
| 14   | f   | 60  | 26         | NEG         | NEG         | POS         | POS         | POS         | POS         |
| 15   | m   | 75  | 34         | NEG         | NEG         | NEG         | POS         | POS         | POS         |
| 16   | m   | 70  | 9          | NEG         | POS         | POS         | POS         | POS         | POS         |
| 17   | m   | 66  | 34         | NEG         | POS         | POS         | POS         | POS         | POS         |
| 18   | m   | 78  | 30         | NEG         | NEG         | POS         | POS         | POS         | POS         |
| 19   | f   | 76  | 31         | NEG         | NEG         | INVALID     | NEG         | POS         | POS         |
| 20   | m   | 66  | 36         | NEG         | NEG         | POS         | POS         | POS         | POS         |
| 21   | m   | 74  | 13         | NEG         | NEG         | NEG         | POS         | POS         | POS         |
| 22   | f   | 60  | 14         | POS         | POS         | POS         | POS         | POS         | POS         |
| 23   | m   | 79  | 9          | NEG         | NEG         | POS         | POS         | POS         | POS         |
| 24   | m   | 68  | 30         | NEG         | NEG         | POS         | POS         | POS         | POS         |
| 25   | m   | 51  | 13         | POS         | POS         | POS         | POS         | POS         | POS         |
| 26   | m   | 66  | 25         | NEG         | NEG         | NEG         | POS         | POS         | POS         |
| 27   | m   | 67  | 31         | POS         | POS         | POS         | POS         | POS         | POS         |
| 28   | m   | 78  | 35         | NEG         | NEG         | POS         | POS         | POS         | POS         |
| 29   | f   | 84  | 19         | NEG         | NEG         | POS         | POS         | POS         | POS         |
| 30   | m   | 64  | 28         | NEG         | POS         | POS         | POS         | POS         | POS         |
| 31   | m   | 76  | 22         | NEG         | NEG         | POS         | POS         | POS         | POS         |
| 32   | m   | 51  | 28         | NEG         | POS         | POS         | POS         | POS         | POS         |
| 33   | m   | 83  | 14         | NEG         | NEG         | POS         | POS         | POS         | POS         |
| 34   | m   | 62  | 15         | NEG         | POS         | NEG         | NEG         | POS         | POS         |
| 35   | m   | 65  | 41         | POS         | POS         | POS         | POS         | POS         | POS         |

|    |   |    |    |     |     |     |     |     |     |
|----|---|----|----|-----|-----|-----|-----|-----|-----|
| 36 | m | 81 | 11 | POS | NEG | POS | POS | POS | POS |
| 37 | m | 70 | 38 | NEG | NEG | POS | POS | POS | POS |
| 38 | m | 71 | 16 | NEG | NEG | POS | POS | POS | POS |
| 39 | m | 72 | 14 | NEG | POS | POS | POS | POS | POS |
| 40 | m | 71 | 16 | NEG | NEG | POS | POS | NEG | POS |
| 41 | m | 56 | 35 | NEG | NEG | POS | POS | POS | POS |

**Table S3.** Characteristics of SARS-CoV-2 IgG detection by three COVID-19 IgM/IgG Rapid Test, recombinant IFA and Euroimmun IgG ELISA immunoassays in 50 asymptomatic controls

| Case | Sex | Age | IgG RDT-A |        | IgG RDT-B |        | IgG RDT-C |        | rIFA IgG | ELISA IgG |        |
|------|-----|-----|-----------|--------|-----------|--------|-----------|--------|----------|-----------|--------|
|      |     |     | WB        | Plasma | WB        | Plasma | WB        | Plasma |          | Ratio     | Result |
| 1    | f   | 55  | NEG       | NEG    | NEG       | NEG    | NEG       | NEG    | NEG      | 0.67      | INDET. |
| 2    | m   | 24  | NEG       | NEG    | NEG       | NEG    | NEG       | NEG    | NEG      | 0.52      | INDET. |
| 3    | f   | 48  | NEG       | NEG    | NEG       | NEG    | NEG       | NEG    | NEG      | 0.34      | NEG    |
| 4    | f   | 52  | NEG       | NEG    | NEG       | NEG    | NEG       | NEG    | NEG      | 0.43      | NEG    |
| 5    | m   | 47  | NEG       | NEG    | NEG       | NEG    | NEG       | NEG    | NEG      | 0.42      | NEG    |
| 6    | f   | 30  | NEG       | NEG    | NEG       | NEG    | NEG       | NEG    | NEG      | 0.31      | NEG    |
| 7    | m   | 36  | NEG       | NEG    | NEG       | NEG    | NEG       | NEG    | NEG      | 0.63      | INDET. |
| 8    | f   | 47  | NEG       | NEG    | NEG       | NEG    | NEG       | NEG    | NEG      | 0.85      | INDET. |
| 9    | m   | 42  | NEG       | NEG    | NEG       | NEG    | NEG       | NEG    | NEG      | 0.35      | NEG    |
| 10   | f   | 59  | NEG       | NEG    | NEG       | NEG    | NEG       | NEG    | NEG      | 0.34      | NEG    |
| 11   | m   | 29  | NEG       | NEG    | NEG       | NEG    | NEG       | NEG    | NEG      | 0.36      | NEG    |
| 12   | f   | 42  | NEG       | NEG    | NEG       | NEG    | NEG       | NEG    | NEG      | 0.29      | NEG    |
| 13   | f   | 47  | NEG       | NEG    | NEG       | NEG    | NEG       | NEG    | NEG      | 0.34      | NEG    |
| 14   | f   | 53  | NEG       | NEG    | NEG       | NEG    | NEG       | NEG    | NEG      | 0.29      | NEG    |
| 15   | f   | 47  | NEG       | NEG    | NEG       | NEG    | NEG       | NEG    | NEG      | 0.22      | NEG    |
| 16   | m   | 48  | NEG       | NEG    | NEG       | NEG    | NEG       | NEG    | NEG      | 0.41      | NEG    |
| 17   | f   | 61  | POS       | POS    | POS       | POS    | POS       | POS    | POS      | 2.81      | POS    |
| 18   | m   | 49  | NEG       | NEG    | NEG       | NEG    | NEG       | NEG    | NEG      | 0.26      | NEG    |
| 19   | f   | 30  | NEG       | NEG    | NEG       | NEG    | NEG       | NEG    | NEG      | 0.26      | NEG    |
| 20   | f   | 59  | NEG       | NEG    | NEG       | NEG    | NEG       | NEG    | NEG      | 0.29      | NEG    |
| 21   | f   | 35  | NEG       | NEG    | NEG       | NEG    | NEG       | NEG    | NEG      | 0.25      | NEG    |
| 22   | f   | 43  | NEG       | NEG    | NEG       | NEG    | NEG       | NEG    | NEG      | 0.3       | NEG    |
| 23   | f   | 61  | NEG       | NEG    | NEG       | NEG    | NEG       | NEG    | NEG      | 0.33      | NEG    |
| 24   | f   | 55  | NEG       | NEG    | NEG       | NEG    | NEG       | NEG    | NEG      | 0.2       | NEG    |
| 25   | m   | 38  | NEG       | NEG    | NEG       | NEG    | NEG       | NEG    | NEG      | 0.61      | INDET. |
| 26   | f   | 46  | NEG       | NEG    | NEG       | NEG    | NEG       | NEG    | NEG      | 0.27      | NEG    |
| 27   | f   | 48  | NEG       | NEG    | NEG       | NEG    | NEG       | NEG    | NEG      | 0.24      | NEG    |
| 28   | f   | 22  | NEG       | NEG    | NEG       | NEG    | NEG       | NEG    | NEG      | 0.28      | NEG    |
| 29   | f   | 61  | NEG       | NEG    | NEG       | NEG    | NEG       | NEG    | NEG      | 0.25      | NEG    |
| 30   | f   | 22  | NEG       | NEG    | NEG       | NEG    | NEG       | NEG    | NEG      | 0.26      | NEG    |
| 31   | f   | 44  | NEG       | NEG    | NEG       | NEG    | NEG       | NEG    | NEG      | 0.47      | NEG    |
| 32   | f   | 58  | NEG       | NEG    | NEG       | NEG    | NEG       | NEG    | NEG      | 0.3       | NEG    |
| 33   | m   | 46  | NEG       | NEG    | NEG       | NEG    | NEG       | NEG    | NEG      | 0.25      | NEG    |
| 34   | f   | 40  | NEG       | NEG    | NEG       | NEG    | NEG       | NEG    | NEG      | 0.26      | NEG    |
| 35   | f   | 61  | NEG       | NEG    | NEG       | NEG    | NEG       | NEG    | NEG      | 0.29      | NEG    |
| 36   | f   | 37  | NEG       | NEG    | NEG       | NEG    | NEG       | NEG    | NEG      | 0.27      | NEG    |
| 37   | f   | 44  | NEG       | NEG    | NEG       | NEG    | NEG       | NEG    | NEG      | 0.29      | NEG    |
| 38   | f   | 55  | NEG       | NEG    | NEG       | NEG    | NEG       | NEG    | NEG      | 0.31      | NEG    |

|    |   |    |     |     |     |     |     |     |     |      |        |
|----|---|----|-----|-----|-----|-----|-----|-----|-----|------|--------|
| 39 | f | 50 | NEG | NEG | NEG | NEG | NEG | NEG | NEG | 0.46 | NEG    |
| 40 | f | 39 | NEG | NEG | NEG | NEG | NEG | NEG | NEG | 0.28 | NEG    |
| 41 | f | 49 | NEG | NEG | NEG | NEG | NEG | NEG | NEG | 0.31 | NEG    |
| 42 | f | 46 | NEG | NEG | NEG | NEG | NEG | NEG | NEG | 0.28 | NEG    |
| 43 | f | 62 | NEG | NEG | NEG | NEG | NEG | NEG | NEG | 0.27 | NEG    |
| 44 | f | 46 | NEG | NEG | NEG | NEG | NEG | NEG | NEG | 0.78 | INDET. |
| 45 | f | 62 | NEG | NEG | NEG | NEG | NEG | NEG | NEG | 0.43 | NEG    |
| 46 | f | 60 | NEG | NEG | NEG | NEG | NEG | NEG | NEG | 0.27 | NEG    |
| 47 | f | 46 | NEG | NEG | NEG | NEG | NEG | NEG | NEG | 0.25 | NEG    |
| 48 | m | 55 | NEG | NEG | NEG | NEG | NEG | NEG | NEG | 0.35 | NEG    |
| 49 | m | 57 | NEG | NEG | NEG | NEG | NEG | NEG | NEG | 0.3  | NEG    |
| 50 | f | 35 | NEG | NEG | NEG | NEG | NEG | NEG | NEG | 0.81 | INDET. |

**Table S4.** Characteristics of SARS-CoV-2 IgM detection by three COVID-19 IgM/IgG RDT in 50 asymptomatic controls

| Case | Sex | Age | IeG RDT-A |        | IeG RDT-B |        | IeG RDT-C |        |
|------|-----|-----|-----------|--------|-----------|--------|-----------|--------|
|      |     |     | WB        | Plasma | WB        | Plasma | WB        | Plasma |
| 1    | f   | 55  | NEG       | NEG    | NEG       | NEG    | NEG       | NEG    |
| 2    | m   | 24  | NEG       | NEG    | NEG       | NEG    | NEG       | NEG    |
| 3    | f   | 48  | NEG       | NEG    | NEG       | NEG    | NEG       | NEG    |
| 4    | f   | 52  | NEG       | NEG    | NEG       | NEG    | NEG       | NEG    |
| 5    | m   | 47  | NEG       | NEG    | NEG       | NEG    | NEG       | NEG    |
| 6    | f   | 30  | NEG       | NEG    | NEG       | NEG    | NEG       | NEG    |
| 7    | m   | 36  | NEG       | NEG    | NEG       | NEG    | NEG       | NEG    |
| 8    | f   | 47  | NEG       | NEG    | NEG       | NEG    | NEG       | NEG    |
| 9    | m   | 42  | NEG       | NEG    | NEG       | NEG    | NEG       | NEG    |
| 10   | f   | 59  | NEG       | NEG    | NEG       | NEG    | NEG       | NEG    |
| 11   | m   | 29  | NEG       | NEG    | NEG       | NEG    | NEG       | NEG    |
| 12   | f   | 42  | NEG       | NEG    | NEG       | NEG    | NEG       | NEG    |
| 13   | f   | 47  | NEG       | NEG    | NEG       | NEG    | NEG       | NEG    |
| 14   | f   | 53  | NEG       | NEG    | NEG       | NEG    | NEG       | NEG    |
| 15   | f   | 47  | NEG       | NEG    | NEG       | NEG    | NEG       | NEG    |
| 16   | m   | 48  | NEG       | NEG    | NEG       | NEG    | NEG       | NEG    |
| 17   | f   | 61  | NEG       | NEG    | POS       | POS    | POS       | POS    |
| 18   | m   | 49  | NEG       | NEG    | NEG       | NEG    | NEG       | NEG    |
| 19   | f   | 30  | NEG       | NEG    | NEG       | NEG    | NEG       | NEG    |
| 20   | f   | 59  | NEG       | NEG    | NEG       | NEG    | NEG       | NEG    |
| 21   | f   | 35  | NEG       | NEG    | NEG       | NEG    | NEG       | NEG    |
| 22   | f   | 43  | NEG       | NEG    | NEG       | NEG    | NEG       | NEG    |
| 23   | f   | 61  | NEG       | NEG    | NEG       | NEG    | NEG       | NEG    |
| 24   | f   | 55  | NEG       | NEG    | NEG       | NEG    | NEG       | NEG    |
| 25   | m   | 38  | NEG       | NEG    | NEG       | NEG    | NEG       | NEG    |
| 26   | f   | 46  | NEG       | NEG    | NEG       | NEG    | NEG       | NEG    |
| 27   | f   | 48  | NEG       | NEG    | NEG       | NEG    | NEG       | NEG    |
| 28   | f   | 22  | NEG       | NEG    | NEG       | NEG    | NEG       | NEG    |
| 29   | f   | 61  | NEG       | NEG    | NEG       | NEG    | NEG       | NEG    |
| 30   | f   | 22  | NEG       | NEG    | NEG       | NEG    | NEG       | NEG    |
| 31   | f   | 44  | NEG       | NEG    | NEG       | NEG    | NEG       | NEG    |
| 32   | f   | 58  | NEG       | NEG    | NEG       | NEG    | NEG       | NEG    |
| 33   | m   | 46  | NEG       | NEG    | NEG       | NEG    | NEG       | NEG    |
| 34   | f   | 40  | NEG       | NEG    | NEG       | NEG    | NEG       | NEG    |
| 35   | f   | 61  | NEG       | NEG    | NEG       | NEG    | NEG       | NEG    |
| 36   | f   | 37  | NEG       | NEG    | NEG       | NEG    | NEG       | NEG    |

|    |   |    |     |     |     |     |     |     |
|----|---|----|-----|-----|-----|-----|-----|-----|
| 37 | f | 44 | NEG | NEG | NEG | NEG | NEG | NEG |
| 38 | f | 55 | NEG | NEG | NEG | NEG | NEG | NEG |
| 39 | f | 50 | NEG | NEG | NEG | NEG | NEG | NEG |
| 40 | f | 39 | NEG | NEG | NEG | NEG | NEG | NEG |
| 41 | f | 49 | NEG | NEG | NEG | NEG | NEG | NEG |
| 42 | f | 46 | NEG | NEG | NEG | NEG | NEG | NEG |
| 43 | f | 62 | NEG | NEG | NEG | NEG | NEG | NEG |
| 44 | f | 46 | NEG | NEG | NEG | NEG | NEG | NEG |
| 45 | f | 62 | NEG | NEG | NEG | NEG | NEG | NEG |
| 46 | f | 60 | NEG | NEG | NEG | NEG | NEG | NEG |
| 47 | f | 46 | NEG | NEG | NEG | NEG | NEG | NEG |
| 48 | m | 55 | NEG | NEG | NEG | NEG | NEG | NEG |
| 49 | m | 57 | NEG | NEG | NEG | NEG | NEG | NEG |
| 50 | f | 35 | NEG | NEG | NEG | NEG | NEG | NEG |
